# Supplementary material for: Deformation mechanisms and evolution of the microstructure of gouge in the Main Fault in Opalinus Clay in the Mont Terri rock laboratory (CH)
Source: Copernicus journal article supplement (doi:10.5194/se-9-1-2018), 2018-01-09
Supplement: Supplementary file 1 [file se-9-1-2018-supplement.zip]

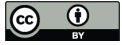

*Supplement of*

**Deformation mechanisms and evolution of the microstructure  
of gouge in the Main Fault in Opalinus Clay in the Mont Terri  
rock laboratory (CH)**

**Ben Laurich et al.**

*Correspondence to:* Ben Laurich ([ben.laurich@bgr.de](mailto:ben.laurich@bgr.de))

- [se-9-1-2018-supplement-title-page.pdf](#)
- [GrainSizeDistributions.xlsm](#)
- [Literature.xlsx](#)

The copyright of individual parts of the supplement might differ from the CC BY 4.0 License.
